# Supplementary material for: Raman fingerprint provides deep insights into alternations in Ganoderma lingzhi triterpene-induced molecular events in cells
Source: Royal Society of Chemistry journal article supplement (doi:10.1039/d4nj00036f), 2024-01-01
Supplement: d4nj00036f1.pdf [file d4nj00036f1.pdf]

*Supporting information for*

**Raman fingerprint provides deep insights into alternations  
in *Ganoderma lingzhi* triterpenes-induced molecular events  
in cells**

Shuwei Shen,<sup>a</sup> Binbin Huang,<sup>a</sup> Zhiyi Peng,<sup>a</sup> Luting Yu,<sup>\*a</sup> Lili Ren,<sup>a</sup> Jia Liu<sup>\*a</sup> and  
Guoguang Chen<sup>\*a</sup>

*School of Pharmaceutical Sciences, Nanjing Tech University, Nanjing 211816, China*

\*E-mail: [jiali@njtech.edu.cn](mailto:jiali@njtech.edu.cn); [lutingyu@njtech.edu.cn](mailto:lutingyu@njtech.edu.cn); [ggchen@njtech.edu.cn](mailto:ggchen@njtech.edu.cn)

**Table of contents**

- Supplementary Data

Table S1 to table S7

Fig. S1 to Fig. S7

## SUPPLEMENTARYDATA

**Table S1**

Detailed HPLC condition settings for chemical analysis of the *G. lingzhi* triterpenes.

| <b>Column:</b> Supersil ODS2 (250×4.6 mm, 5 μm)                                          |                               |                                 |
|------------------------------------------------------------------------------------------|-------------------------------|---------------------------------|
| <b>Flowing Phase:</b> (A) Acetonitrile and (B) 0.1% acetic acid in ultrapure water (v/v) |                               |                                 |
| <b>Detection Wavelength:</b> 254 nm                                                      |                               | <b>Column Temperature:</b> 40°C |
| <b>Detector:</b> UV                                                                      | <b>Detection Time:</b> 80 min | <b>Flow Rate:</b> 1.0 mL/min    |
| <b>Condition 1</b>                                                                       | 0-5min                        | 40.5% A                         |
|                                                                                          | 5-45min                       | 40.5%-44% A                     |
|                                                                                          | 45-70min                      | 44%-94.75% A                    |
|                                                                                          | 70-80min                      | 94.75% A                        |
|                                                                                          | 80-85min                      | 94.75%-40.5% A                  |
|                                                                                          | 85-95min                      | 40.5% A                         |
| <b>Condition 2</b>                                                                       | 0-5min                        | 32% A                           |
|                                                                                          | 5-45min                       | 32%-36% A                       |
|                                                                                          | 45-70min                      | 36%-94% A                       |
|                                                                                          | 70-80min                      | 94% A                           |
|                                                                                          | 80-85min                      | 94%-32% A                       |
|                                                                                          | 85-95min                      | 32% A                           |
| <b>Condition 3</b>                                                                       | 0-5min                        | 34% A                           |
|                                                                                          | 5-45min                       | 34%-36% A                       |
|                                                                                          | 45-70min                      | 36%-94% A                       |
|                                                                                          | 70-78min                      | 94% A                           |
|                                                                                          | 78-83min                      | 94%-34% A                       |
|                                                                                          | 83-93min                      | 34% A                           |

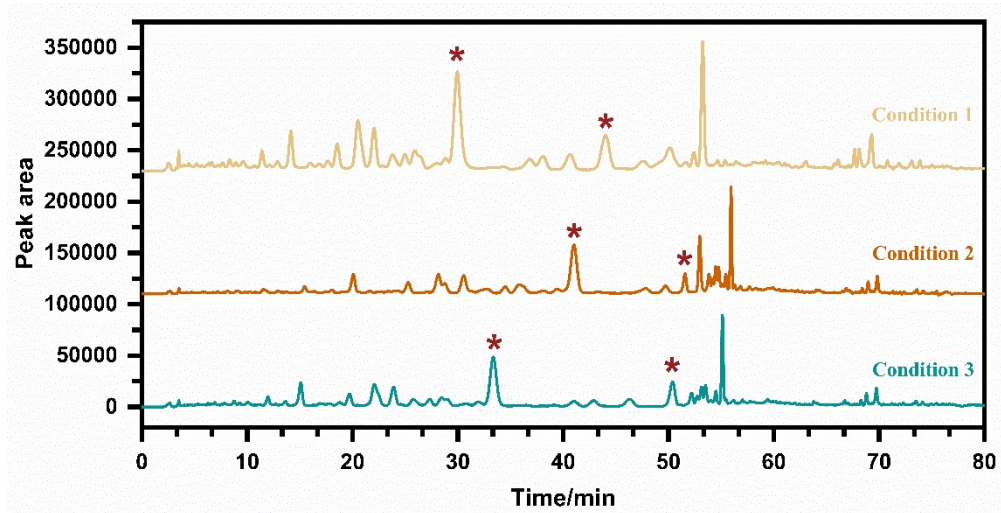

Fig. S1. HPLC analysis of the *G. lingzhi* triterpenes under different conditions.

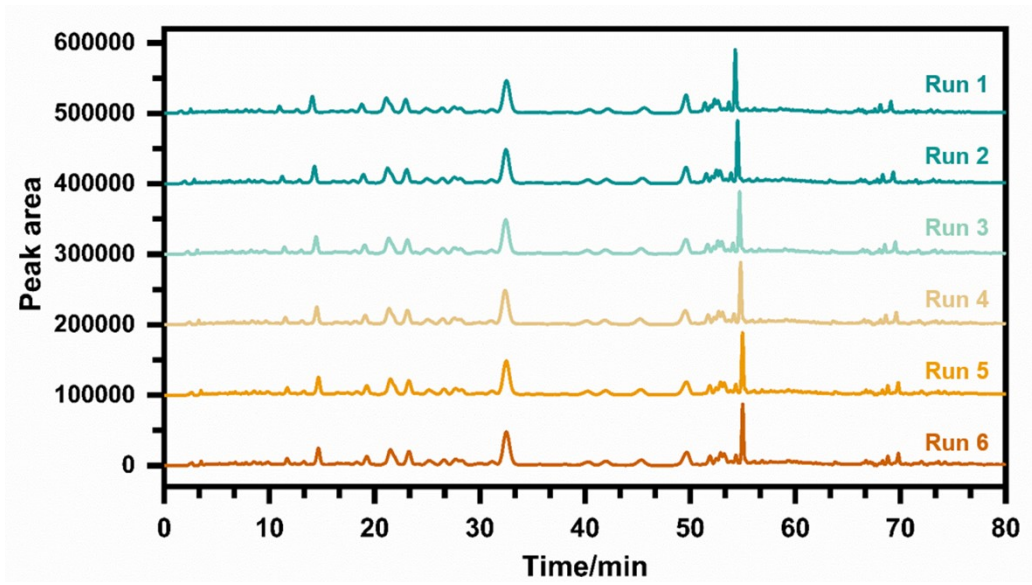

Fig. S2. The precision validation of the *G. lingzhi* triterpenes (n = 6) on the same day.

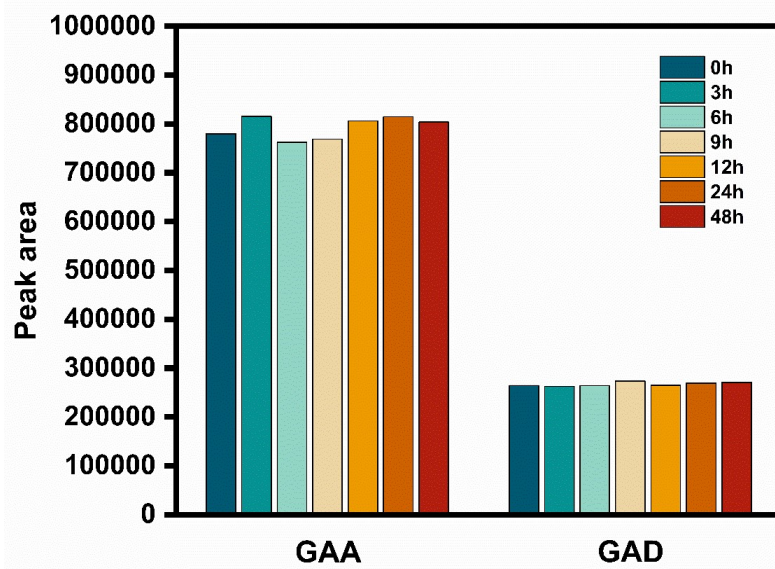

**Fig. S3.** Stability validation of the *G. lingzhi* triterpenes at different times, including 0h, 3h, 6h, 9h, 12h, 24h and 48 h.

**Table S2**

The reproducibility validation of the GAA in three independent sample solutions.

| <b>Sample</b> | <b>Peak area</b> | <b>Content (µg/mL)</b> | <b>Content of Sample (mg/mL)</b> | <b>Sample Weight (mg)</b> | <b>Average contents (mg/g)</b> | <b>RSD%</b> | <b>Content (mg/g)</b> |
|---------------|------------------|------------------------|----------------------------------|---------------------------|--------------------------------|-------------|-----------------------|
| <b>NO.1</b>   | 252048           | 30.14                  | 0.625                            | 141.09                    | 0.69                           | 3.55        | 0.70                  |
|               | 254120           | 30.39                  | 0.625                            | 141.09                    |                                |             |                       |
|               | 255223           | 30.52                  | 0.625                            | 141.09                    |                                |             |                       |
| <b>NO.2</b>   | 282286           | 33.77                  | 0.685                            | 137.64                    | 0.68                           | 3.55        | 0.70                  |
|               | 284482           | 34.03                  | 0.685                            | 137.64                    |                                |             |                       |
|               | 287167           | 34.35                  | 0.685                            | 137.64                    |                                |             |                       |
| <b>NO.3</b>   | 289774           | 34.66                  | 0.660                            | 139.45                    | 0.73                           | 3.55        | 0.70                  |
|               | 283986           | 33.97                  | 0.660                            | 139.45                    |                                |             |                       |
|               | 290006           | 34.69                  | 0.660                            | 139.45                    |                                |             |                       |

**Table S3**

The reproducibility validation of the GAD in three independent sample solutions.

| <b>Sample</b> | <b>Peak area</b> | <b>Content (µg/mL)</b> | <b>Content of Sample (mg/mL)</b> | <b>Sample weight (mg)</b> | <b>Average contents (mg/g)</b> | <b>RSD%</b> | <b>Content (mg/g)</b> |
|---------------|------------------|------------------------|----------------------------------|---------------------------|--------------------------------|-------------|-----------------------|
| <b>NO.1</b>   | 88056            | 10.22                  | 0.625                            | 141.09                    | 0.22                           |             |                       |
|               | 80790            | 9.39                   | 0.625                            | 141.09                    |                                |             |                       |
|               | 81537            | 9.47                   | 0.625                            | 141.09                    |                                |             |                       |
| <b>NO.2</b>   | 98653            | 11.44                  | 0.685                            | 137.64                    | 0.23                           | 3.99        | 0.22                  |
|               | 99192            | 11.51                  | 0.685                            | 137.64                    |                                |             |                       |
|               | 98141            | 11.39                  | 0.685                            | 137.64                    |                                |             |                       |
| <b>NO.3</b>   | 88220            | 10.24                  | 0.660                            | 139.45                    | 0.21                           |             |                       |
|               | 85099            | 9.88                   | 0.660                            | 139.45                    |                                |             |                       |
|               | 86648            | 10.06                  | 0.660                            | 139.45                    |                                |             |                       |

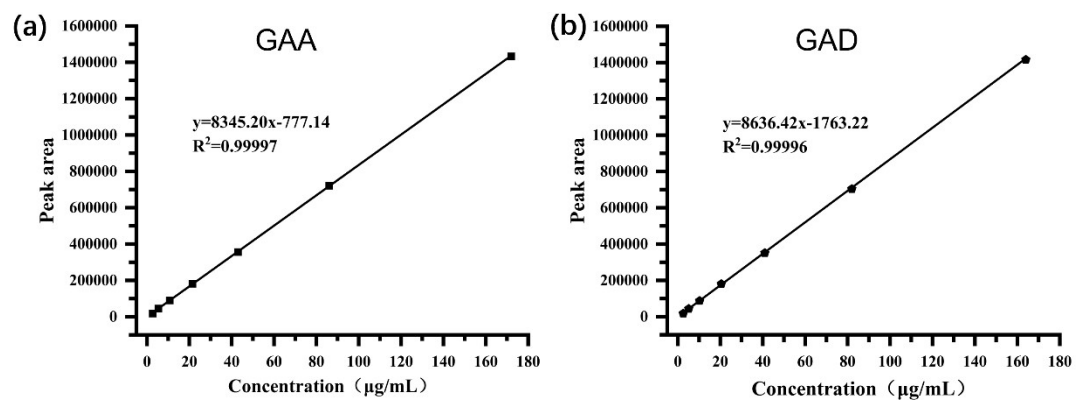

Fig. S4. Liner fitting curves of (a) GAA and (b) GAD standard solutions, respectively.



**Table S4**

The lower limit of detection (LLOD) of two quality control markers.

|      | <b>Peak area of GAA</b> | <b>S/N</b> | <b>Peak area of GAD</b> | <b>S/N</b> |
|------|-------------------------|------------|-------------------------|------------|
| 1    | 1369                    | 3.82       | 3582                    | 3.98       |
| 2    | 1377                    | 3.66       | 3789                    | 3.80       |
| 3    | 1440                    | 3.97       | 3931                    | 3.73       |
| 4    | 1452                    | 3.03       | 3873                    | 3.59       |
| 5    | 1365                    | 3.95       | 3958                    | 3.56       |
| 6    | 1325                    | 3.80       | 3847                    | 3.80       |
| Mean | 1388                    | 3.71       | 3830                    | 3.74       |
| RSD% | 3.50                    |            | 3.54                    |            |

**Table S5**

The lower limit of quantification (LLOQ) of two quality control markers.

|      | <b>Peak area of GAA</b> | <b>S/N</b> | <b>Peak area of GAD</b> | <b>S/N</b> |
|------|-------------------------|------------|-------------------------|------------|
| 1    | 7871                    | 10.65      | 11158                   | 10.28      |
| 2    | 7374                    | 10.90      | 10179                   | 10.55      |
| 3    | 7403                    | 10.41      | 10606                   | 10.59      |
| 4    | 7276                    | 10.94      | 10158                   | 10.68      |
| 5    | 7622                    | 10.52      | 10283                   | 10.41      |
| 6    | 7895                    | 10.52      | 10715                   | 10.38      |
| Mean | 7573.5                  | 10.66      | 10516.5                 | 10.48      |
| RSD% | 3.50                    |            | 3.70                    |            |

**Table S6**

The recovery validation of the two quality control markers.

| <b>Component</b> | <b>Detectable concentration (µg/mL)</b> | <b>Original concentration (µg/mL)</b> | <b>Added concentration (µg/mL)</b> | <b>Recovery (%)</b> | <b>average recovery (%)</b> | <b>RSD %</b> |
|------------------|-----------------------------------------|---------------------------------------|------------------------------------|---------------------|-----------------------------|--------------|
| <b>GAA</b>       | 44.83                                   | 28.91                                 | 15.47                              | 102.87              | 103.67                      | 0.91         |
|                  | 44.86                                   | 28.91                                 | 15.47                              | 103.10              |                             |              |
|                  | 44.90                                   | 28.91                                 | 15.47                              | 103.33              |                             |              |
|                  | 61.16                                   | 28.91                                 | 30.94                              | 104.24              |                             |              |
|                  | 61.07                                   | 28.91                                 | 30.94                              | 103.95              |                             |              |
|                  | 61.48                                   | 28.91                                 | 30.94                              | 105.26              |                             |              |
|                  | 76.99                                   | 28.91                                 | 46.41                              | 103.59              |                             |              |
|                  | 77.42                                   | 28.91                                 | 46.41                              | 104.53              |                             |              |
|                  | 76.32                                   | 28.91                                 | 46.41                              | 102.15              |                             |              |
| <b>GAD</b>       | 14.77                                   | 9.12                                  | 5.84                               | 96.77               | 96.07                       | 1.10         |
|                  | 14.75                                   | 9.12                                  | 5.84                               | 96.40               |                             |              |
|                  | 14.78                                   | 9.12                                  | 5.84                               | 96.92               |                             |              |
|                  | 20.41                                   | 9.12                                  | 11.68                              | 96.62               |                             |              |
|                  | 20.35                                   | 9.12                                  | 11.68                              | 96.17               |                             |              |
|                  | 20.35                                   | 9.12                                  | 11.68                              | 96.14               |                             |              |
|                  | 25.88                                   | 9.12                                  | 17.52                              | 95.63               |                             |              |
|                  | 26.03                                   | 9.12                                  | 17.52                              | 96.50               |                             |              |
|                  | 25.49                                   | 9.12                                  | 17.52                              | 93.44               |                             |              |

**Table S7**Detailed quantitative analysis of GAA and GAD in *G. lingzhi* triterpenes.

|            | Precision | Stability | Reproducibility | Accuracy      |       | Content<br>(mg/g) |
|------------|-----------|-----------|-----------------|---------------|-------|-------------------|
|            |           |           |                 | Recovery Rate | RSD   |                   |
| <b>GAA</b> | 1.87%     | 2.80%     | 3.55%           | 103.67%       | 0.91% | 0.67              |
| <b>GAD</b> | 0.89%     | 1.54%     | 3.99%           | 96.07%        | 1.10% | 0.23              |

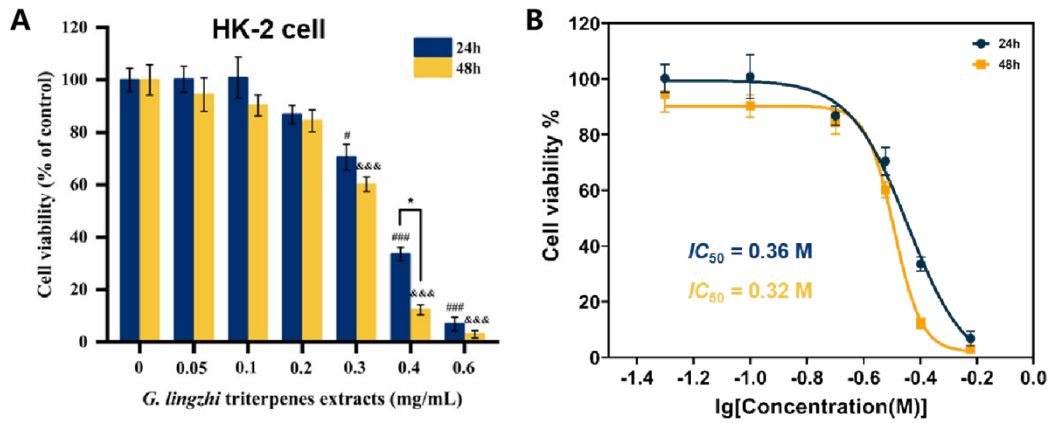

**Fig. S5.** HK-2 cells were treated with *G. lingzhi* triterpenes (0-0.6 mg/mL) for 24 and 48 hours, then subjected to cell counting. (n=5, # represents compared with the 24h control group,  $P<0.05$ ; ### represents compared with the 24h control group,  $P<0.001$ ; &&& represents compared with the 48h control group,  $P<0.001$ ; \* represents the comparison between 24h and 48h at the same concentration,  $P<0.05$ .)

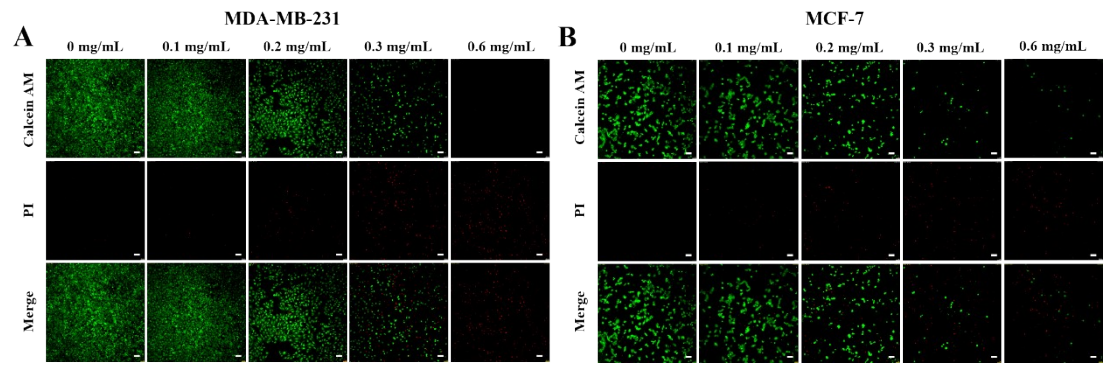

**Fig. S6.** Confocal laser scanning microscopy images of (A) MDA-MB-231 and (B) MCF-7 cells stained by calcein AM (green) and PI (red) after treatment with various concentrations of the *G. lingzhi* triterpenes for 48 hours. Scale bar: 50  $\mu\text{m}$ .

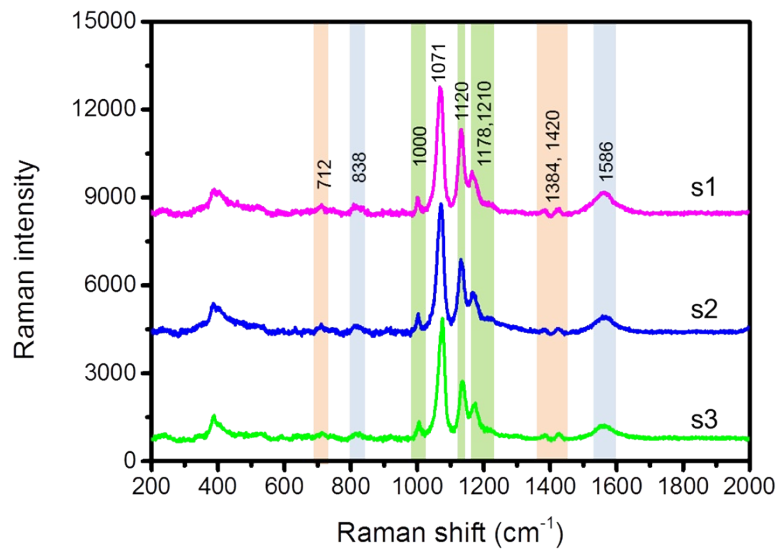

**Fig. S7.** Fingerprinting the contents of MDA-MB-231 cells in three parallel samples (n=3).
